# Supplementary material
Source: PubMed Central journal article supplement (PMC2758242)

**Table e-1: ICD-9 codes used in this study****ICD-9 Code****Disease/diagnosis**

---

|                          |                                                                                                                     |
|--------------------------|---------------------------------------------------------------------------------------------------------------------|
| 331.0                    | Alzheimer's disease                                                                                                 |
| 290.0-290.3              | 'Senile' dementias                                                                                                  |
| 290.4-290.9              | Vascular dementia and unspecified dementias                                                                         |
| 331.1-331.2              | Frontotemporal degeneration and 'senile degeneration'                                                               |
| 331.9                    | Unspecified cerebral degeneration                                                                                   |
| 797                      | 'Senility'                                                                                                          |
| 250                      | Diabetes mellitus                                                                                                   |
| 274                      | Gout                                                                                                                |
| 295                      | Schizophrenia                                                                                                       |
| 296.2-269.3, 311         | Major Depression                                                                                                    |
| 296.0-296.1, 296.4-296.8 | Bipolar disorder                                                                                                    |
| 300.0                    | Anxiety disorder                                                                                                    |
| 388.3                    | Tinnitus                                                                                                            |
| 389                      | Hearing loss                                                                                                        |
| 401-405                  | Hypertension                                                                                                        |
| 410-414                  | Ischemic heart disease                                                                                              |
| 440                      | Peripheral vascular disease                                                                                         |
| 446                      | Vasculitides                                                                                                        |
| 530-535                  | Esophageal, gastric, peptic, gastrojejunal, and other ulcer disease<br>(gastroesophageal reflux is included in 530) |
| 555-556                  | Inflammatory bowel disease                                                                                          |
| 578                      | Upper and/or lower gastrointestinal bleeding                                                                        |
| 584                      | Acute renal failure                                                                                                 |
| 585                      | Chronic kidney disease                                                                                              |
| 586                      | Renal failure, unspecified                                                                                          |
| 710                      | Connective tissue diseases                                                                                          |
| 712                      | Crystal arthropathies, excluding gout                                                                               |
| 714                      | Rheumatoid arthritis                                                                                                |
| 715, 721                 | Osteoarthritis                                                                                                      |
| 720                      | Spondyloarthropathies                                                                                               |

**Table e-1: Comorbid diseases in the sample**

| <b>Comorbidities</b>                    | <b>Cases (#)</b> | <b>Cases (%)</b> | <b>Controls (#)</b> | <b>Controls (%)</b> |
|-----------------------------------------|------------------|------------------|---------------------|---------------------|
| Low dose aspirin                        | 24,045           | 48.7             | 77,423              | 39.3                |
| Cardiovascular disease and risk factors |                  |                  |                     |                     |
| Hypertension                            | 40,077           | 81.2             | 158,263             | 80.4                |
| Hyperlipidemia                          | 27,225           | 55.2             | 117,063             | 59.5                |
| Ischemic Heart Disease                  | 25,693           | 52.1             | 100,075             | 50.8                |
| Diabetes mellitus                       | 16,989           | 34.4             | 67,051              | 34.1                |
| Congestive Heart Failure                | 12,366           | 25.1             | 47,177              | 24.0                |
| Transient Ischemic Attack               | 5,223            | 10.6             | 13,275              | 6.7                 |
| Peripheral Vascular Disease             | 4,952            | 10.0             | 19,095              | 9.7                 |
| Stroke                                  | 4,025            | 8.2              | 8,664               | 4.4                 |
| Chronic obstructive pulmonary disease   | 15,611           | 31.6             | 62,264              | 31.6                |
| Gastrointestinal disease                |                  |                  |                     |                     |
| Ulcer Disease                           | 19,139           | 38.8             | 73,922              | 37.6                |
| Gastroesophageal reflux                 | 16,183           | 32.8             | 63,812              | 32.4                |
| Gastrointestinal Bleeding               | 5,927            | 12.0             | 18,932              | 9.6                 |
| Inflammatory Bowel Disease              | 630              | 1.3              | 2,297               | 1.2                 |
| Kidney disease                          |                  |                  |                     |                     |
| Chronic Renal Insufficiency             | 4,187            | 8.5              | 17,623              | 9.0                 |
| Acute Renal Failure                     | 3,212            | 6.5              | 7,677               | 3.9                 |
| Unspecified Renal Failure               | 1,817            | 3.7              | 7,018               | 3.6                 |
| Rheumatologic disease                   |                  |                  |                     |                     |
| Osteoarthritis                          | 23,700           | 48.0             | 90,589              | 46.0                |
| Gout                                    | 3,966            | 8.0              | 19,317              | 9.8                 |
| Rheumatoid Arthritis                    | 1,806            | 3.7              | 7,328               | 3.7                 |
| Ankylosing Spondylitis                  | 329              | 0.7              | 1,445               | 0.7                 |
| Connective Tissue Diseases              | 252              | 0.5              | 1,040               | 0.5                 |
| Other Crystal Arthropathy               | 196              | 0.4              | 696                 | 0.4                 |
| Vasculitis                              | 205              | 0.4              | 647                 | 0.3                 |
| Mental Illness                          |                  |                  |                     |                     |
| Major Depression                        | 20,071           | 40.7             | 36,713              | 18.7                |
| Anxiety Disorder                        | 9,035            | 18.3             | 21,712              | 11.0                |
| Bipolar Disorder                        | 8,223            | 16.7             | 12,894              | 6.6                 |
| PTSD                                    | 3,914            | 7.9              | 8,893               | 4.5                 |
| Schizophrenia                           | 2,643            | 5.4              | 3,572               | 1.8                 |
| Other side effects of NSAID use         |                  |                  |                     |                     |
| Tinnitus                                | 3,361            | 6.8              | 13,716              | 7.0                 |
| Hearing Loss                            | 18,414           | 37.3             | 67,570              | 34.3                |

Table e-3: NSAID use in the sample

|                                          | Prescribed at Least Once (%) |              | Over 1 Year of Use (%) |              | Over 5 Years of Use (%) |             |
|------------------------------------------|------------------------------|--------------|------------------------|--------------|-------------------------|-------------|
|                                          | Cases                        | Controls     | Cases                  | Controls     | Cases                   | Controls    |
| <b>Any NSAID</b>                         | <b>42.17</b>                 | <b>40.16</b> | <b>14.92</b>           | <b>14.91</b> | <b>0.81</b>             | <b>0.99</b> |
| <b>Arylpropionic Acid Derivatives</b>    | <b>31.31</b>                 | <b>29.11</b> | <b>7.71</b>            | <b>7.90</b>  | <b>0.22</b>             | <b>0.36</b> |
| Ibuprofen                                | 20.85                        | 18.72        | 4.02                   | 4.12         | 0.11                    | 0.20        |
| Ketoprofen                               | 0.04                         | 0.06         | 0.01                   | 0.02         | 0.00                    | 0.00        |
| Naproxen                                 | 15.17                        | 14.59        | 3.21                   | 3.32         | 0.08                    | 0.11        |
| Oxaprozin                                | 0.58                         | 0.55         | 0.13                   | 0.13         | 0.00                    | 0.01        |
| <b>Indolic Acid Derivatives</b>          | <b>10.79</b>                 | <b>11.08</b> | <b>2.08</b>            | <b>2.08</b>  | <b>0.04</b>             | <b>0.06</b> |
| Etodolac                                 | 5.01                         | 5.22         | 1.00                   | 0.93         | 0.00                    | 0.00        |
| Indomethacin                             | 3.70                         | 4.07         | 0.36                   | 0.47         | 0.01                    | 0.01        |
| Sulindac                                 | 3.05                         | 2.83         | 0.66                   | 0.59         | 0.03                    | 0.03        |
| <b>Cox-II Inhibitors</b>                 | <b>4.90</b>                  | <b>4.99</b>  | <b>1.70</b>            | <b>1.81</b>  | <b>0.02</b>             | <b>0.02</b> |
| Celecoxib                                | 3.02                         | 2.99         | 0.99                   | 1.02         | 0.02                    | 0.02        |
| Rofecoxib                                | 2.37                         | 2.51         | 0.64                   | 0.71         | 0.00                    | 0.00        |
| Valdecoxib                               | 0.22                         | 0.27         | 0.02                   | 0.02         | 0.00                    | 0.00        |
| <b>Enolic Acid Derivatives.</b>          | <b>3.24</b>                  | <b>3.30</b>  | <b>0.79</b>            | <b>0.82</b>  | <b>0.03</b>             | <b>0.05</b> |
| Meloxicam                                | 0.45                         | 0.50         | 0.04                   | 0.06         | 0.00                    | 0.00        |
| Piroxicam                                | 2.16                         | 2.15         | 0.59                   | 0.58         | 0.02                    | 0.04        |
| Nabumetone                               | 0.73                         | 0.71         | 0.16                   | 0.15         | 0.01                    | 0.01        |
| <b>Heteroarylacetic Acid Derivatives</b> | <b>2.99</b>                  | <b>3.20</b>  | <b>0.55</b>            | <b>0.67</b>  | <b>0.02</b>             | <b>0.03</b> |
| Diclofenac                               | 2.45                         | 2.70         | 0.52                   | 0.63         | 0.02                    | 0.03        |
| Ketorolac                                | 0.35                         | 0.33         | 0.00                   | 0.00         | 0.00                    | 0.00        |
| Tolmetin                                 | 0.23                         | 0.22         | 0.04                   | 0.04         | 0.00                    | 0.00        |
| <b>Non-acetylated NSAIDs</b>             | <b>6.90</b>                  | <b>5.80</b>  | <b>1.57</b>            | <b>1.08</b>  | <b>0.06</b>             | <b>0.06</b> |
| Diflunisal                               | 0.13                         | 0.11         | 0.03                   | 0.02         | 0.00                    | 0.00        |
| Salsalate                                | 5.91                         | 4.89         | 1.37                   | 0.93         | 0.05                    | 0.05        |
| Salicylates                              | 0.94                         | 0.87         | 0.15                   | 0.13         | 0.00                    | 0.00        |
| <b>High Dose ASA</b>                     | <b>0.08</b>                  | <b>0.06</b>  | <b>0.02</b>            | <b>0.01</b>  | <b>0.00</b>             | <b>0.00</b> |

**Protective effects of NSAIDs on the development of Alzheimer disease**

Steven C. Vlad, Donald R. Miller, Neil W. Kowall and David T. Felson

*Neurology* 2008;70;1672-1677

DOI: 10.1212/01.wnl.0000311269.57716.63

**This information is current as of May 6, 2008**

|                                           |                                                                                                                                                                                                                                                                                                                                                                                                                                                                                                                                                                                                         |
|-------------------------------------------|---------------------------------------------------------------------------------------------------------------------------------------------------------------------------------------------------------------------------------------------------------------------------------------------------------------------------------------------------------------------------------------------------------------------------------------------------------------------------------------------------------------------------------------------------------------------------------------------------------|
| <b>Updated Information &amp; Services</b> | including high-resolution figures, can be found at:<br><a href="http://www.neurology.org/cgi/content/full/70/19/1672">http://www.neurology.org/cgi/content/full/70/19/1672</a>                                                                                                                                                                                                                                                                                                                                                                                                                          |
| <b>Supplementary Material</b>             | Supplementary material can be found at:<br><a href="http://www.neurology.org/cgi/content/full/70/19/1672/DC1">http://www.neurology.org/cgi/content/full/70/19/1672/DC1</a>                                                                                                                                                                                                                                                                                                                                                                                                                              |
| <b>Subspecialty Collections</b>           | This article, along with others on similar topics, appears in the following collection(s):<br><b>Alzheimer's disease</b><br><a href="http://www.neurology.org/cgi/collection/alzheimers_disease">http://www.neurology.org/cgi/collection/alzheimers_disease</a> <b>Case control studies</b><br><a href="http://www.neurology.org/cgi/collection/case_control_studies">http://www.neurology.org/cgi/collection/case_control_studies</a><br><b>Incidence studies</b><br><a href="http://www.neurology.org/cgi/collection/incidence_studies">http://www.neurology.org/cgi/collection/incidence_studies</a> |
| <b>Permissions &amp; Licensing</b>        | Information about reproducing this article in parts (figures, tables) or in its entirety can be found online at:<br><a href="http://www.neurology.org/misc/Permissions.shtml">http://www.neurology.org/misc/Permissions.shtml</a>                                                                                                                                                                                                                                                                                                                                                                       |
| <b>Reprints</b>                           | Information about ordering reprints can be found online:<br><a href="http://www.neurology.org/misc/reprints.shtml">http://www.neurology.org/misc/reprints.shtml</a>                                                                                                                                                                                                                                                                                                                                                                                                                                     |

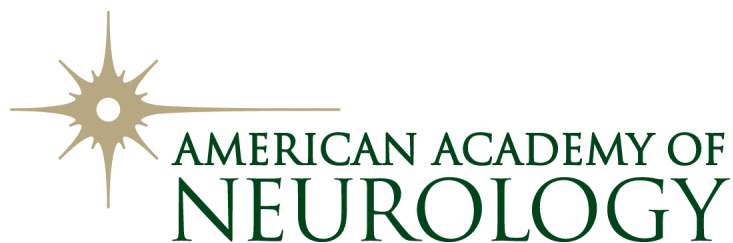

Supplement: NIHMS140887-supplement-supplement_1.pdf [file NIHMS140887-supplement-supplement_1.pdf]
